# Supplementary material for: Missed opportunity for tuberculosis screening and prevention and the associated factors among child contacts in rural southwestern Uganda
Source: Research Square preprint supplement (doi:10.21203/rs.3.rs-5781197/v1), 2025-05-06
Supplement: Supplementary file 1 [file 0683fa8dfc44a2193b2498e6.pdf]

# TB study

## Identification number of contact

*Contact ID*

---

## Linked TB case ID

*TB Case ID*

---

## Age (years)

*Age of contact*

---

## Sex

- ☐ Female
- ☐ Male

## History of symptoms related to TB

*TB symptoms*

- ☐ No symptoms
- ☐ Fevers for 2 weeks or more
- ☐ Cough for 2 weeks or more
- ☐ weight loss/poor weight gain
- ☐ Night sweats for 2 weeks or more

## Education level

*Level of education*

- ☐ Preschool
- ☐ Nursery
- ☐ Primary
- ☐ Secondary

### TB treatment history

*TB treatment*

- ☐ Completed
- ☐ Currently on treatment
- ☐ Never initiated
- ☐ Never assessed

### Length of stay in a household with a TB patient

*Household length of stay*

- ☐ Less than 10 days
- ☐ 10 days or more

### TB preventive therapy course

*TPT*

- ☐ Completed
- ☐ On course
- ☐ Never initiated
- ☐ Not applicable

### HIV exposure

*HIV Exposed*

- ☐ Yes
- ☐ No

### HIV status

*HIV status*

- ☐ HIV Positive
- ☐ HIV Negative
- ☐ Unknown

### MUAC in cm

*Mid upper arm circumference*

---

### Weight in kg

*Weight*

---

Height in cm

---

Temperature in degrees celcius

Temperature

---

Household condition

Housing condition

- ☐ Well ventilated
- ☐ Poorly ventilated

Household ID of TB case patient

HH ID

---

Age of TB case in years

TB case-patient age

---

Sex of TB patient

Sex of Index TB patient

- ☐ Male
- ☐ Female

Address

Address of index TB case

- ☐ Rural
- ☐ Urban

Weekly income of TB patient

State of weekly income

---

### Highest education level

*Level of education for index TB case*

- ☐ None
- ☐ Primary
- ☐ Secondary
- ☐ Tertiary

### Tribe

*Tribe of index TB case*

- ☐ Mukiga
- ☐ Munyankole
- ☐ Mufumbira
- ☐ Others

### Religion

*Religion of index case*

- ☐ Christian
- ☐ Muslim
- ☐ Non-believer

### Smoking

*Smoking history of index case*

- ☐ Tobacco use
- ☐ Non-tobacco use

### Number of persons in household

*Household size of index TB case*

---

### How many stay in same room with contact?

---

### When diagnosis was made

*Contact tracing for index client*

- ☐ Contact tracing was performed
- ☐ No contact tracing was performed

**Did you disclose TB status to others?**

*TB status disclosure*

- ☐ Yes
- ☐ No

**Are there children from the neighborhood staying in the house?**

*Children sharing same house*

- ☐ Yes
- ☐ No

**Cadre of health worker that initiated treatment**

*Cadre of HCW initiating treatment for index case*

- ☐ Pediatrician
- ☐ Medical officer
- ☐ Clinical officer
- ☐ Nurse
- ☐ Others

**Distance to health facility**

---

**Working hours**

*Index client working hours*

- ☐ Long hours
- ☐ Standard hours

**Alcoholic**

*Alcohol intake by index case*

- ☐ Yes
- ☐ No

**Any household smoker?**

*Smoking in household*

- ☐ Yes
- ☐ No

### Health facility of index TB patient

*Health facility*

- ☐ Kihiki HCIV
- ☐ Kambuga Hospital
- ☐ Katete HCIII
- ☐ Nyamirama HCIII
